# Supplementary material for: Free energy dependence of the diffusion-limited quenching rate constants in photoinduced electron transfer processes
Source: Royal Society of Chemistry journal article supplement (doi:10.1039/b708797g), 2007-11-14

**Supporting Information for:**

**Free Energy Dependence of the Diffusion-Limited Quenching Rate Constants in  
Photoinduced Electron Transfer Processes**

Vicente Avila, Carlos M. Previtali and Carlos A. Chesta\*

Departamento de Química, Universidad Nacional de Río Cuarto, 5800-Río Cuarto, Argentina

**Chart 1:** Structure of the fluorophores involved in the study.

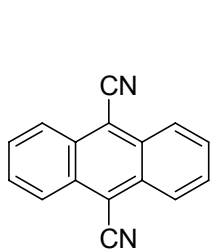

9,10-Dicyanoanthracene

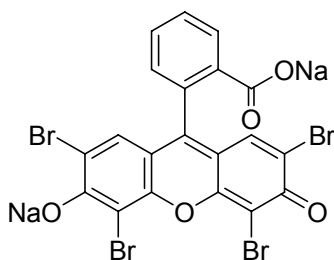

Eosin Y

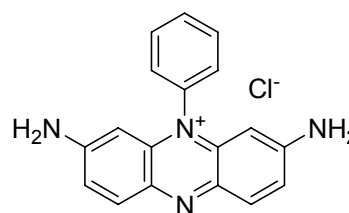

Phenosafranine

**Figure 1-SI:** Fluorescence decay of DCA in acetonitrile in the presence of TMPD 0.02 M. Lamp profile (curve a, ●) and response function (curve b, ○). The solid line represents the fit of the experimental data to a monoexponential decay model ( $\tau=1.69$  ns,  $\chi^2 = 1.082$ ).

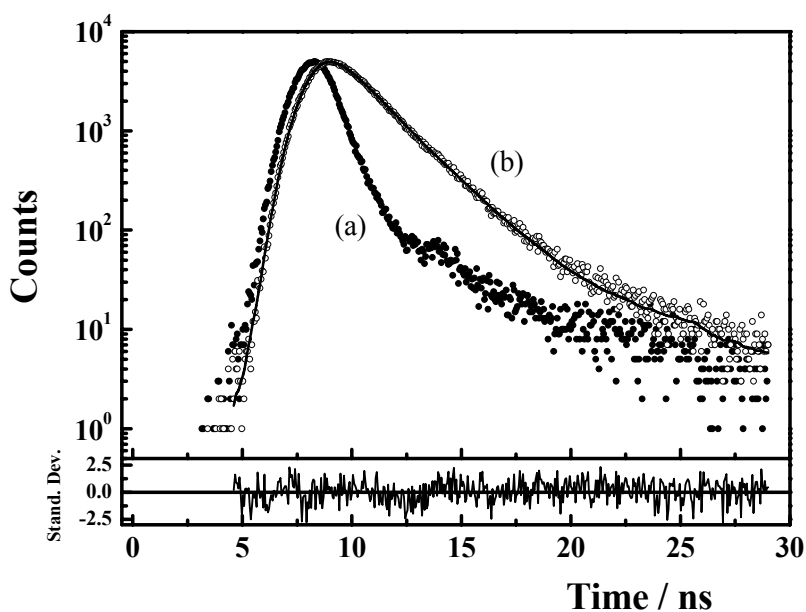

**Figure 2-SI:** Stern-Volmer ( $\tau_o / \tau$ ) plots for the quenching of DCA by anisole ( $\blacktriangle$ ); 124TMB ( $\circ$ ) and TMPD ( $\bullet$ ) in acetonitrile at 298 K.

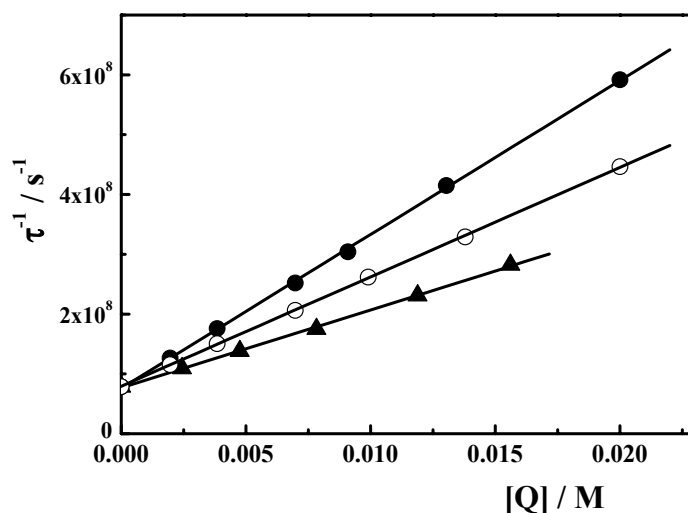

**Figure 3 SI:** Bimolecular rate constants ( $k_q$ ) for the quenching of DCA ( $\square$ ) and PS ( $\circ$ ) by electron donors, PS ( $\bullet$ ) and Eosin Y ( $\blacksquare$ ) by electron acceptors and Rehm and Weller data ( $\times$ ) as a function of  $\Delta G_{et}$ . The solid line corresponds to the simulation of the second order diffusion-mediated ET rate constant according to the model developed by Tachiya and Murata. The parameters used for the simulation are:  $r_D = r_A = 0.35$  nm,  $\lambda_v = 0.35$  eV,  $V_o = 100$  cm<sup>-1</sup>,  $\beta = 10$  nm<sup>-1</sup> and  $D = 3.0 \times 10^{-9}$  m<sup>2</sup>/s.

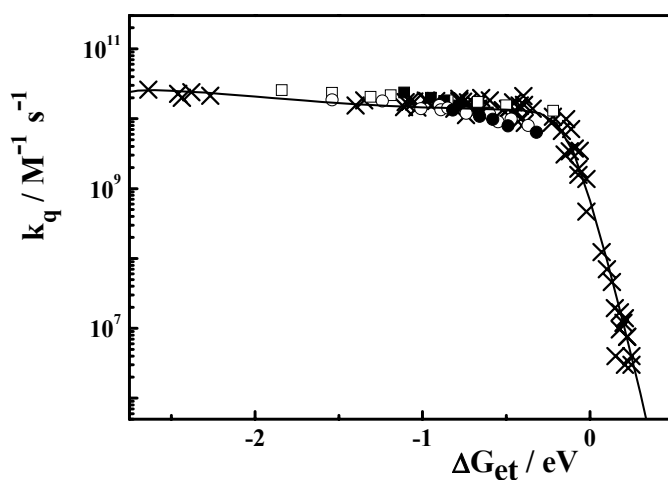

**Table 1-SI:** Bimolecular rate constants ( $k_q$ ) for the singlet excited state quenching of Phenoafranine by aromatic electron donors in acetonitrile at 298 K. The data were taken from Ref. 22 (main text).

| Quencher                | $E_{ox}$<br>(V vs. SCE) | $\Delta G_{et}$<br>(eV) | $k_q \times 10^{10}$<br>( $M^{-1} s^{-1}$ ) | $\beta$<br>( $nm^{-1}$ ) |
|-------------------------|-------------------------|-------------------------|---------------------------------------------|--------------------------|
| TMPD                    | 0.16                    | -1.54                   | 1.87                                        | 8.5                      |
| TMBZ                    | 0.32                    | -1.24                   | 1.80                                        | 8.8                      |
| p-anisidine             | 0.66                    | -1.01                   | 1.39                                        | 9.2                      |
| N,N-dimethylaniline     | 0.77                    | -0.90                   | 1.54                                        | 9.4                      |
| p-toluidine             | 0.78                    | -0.89                   | 1.34                                        | 9.4                      |
| N-methylaniline         | 0.82                    | -0.85                   | 1.42                                        | 9.4                      |
| aniline                 | 0.93                    | -0.74                   | 1.20                                        | 9.6                      |
| 2-methylindole          | 1.07                    | -0.60                   | 1.16                                        | 9.8                      |
| 1,2,4-trimethoxybenzene | 1.12                    | -0.55                   | 0.90                                        | 9.8                      |
| indole                  | 1.20                    | -0.47                   | 0.99                                        | 9.8                      |
| 1,4-dimethoxybenzene    | 1.30                    | -0.37                   | 0.80                                        | 9.8                      |

**Table 2-SI:** Estimated radii ( $R$ ) and AM1 theoretically calculated contributions of the internal reorganization energy,  $\lambda_v$ .

| Compound              | $R / \text{nm}$ | $\lambda_{vA} / \text{eV}$ | $\lambda_{vD} / \text{eV}$ |
|-----------------------|-----------------|----------------------------|----------------------------|
| 1,9-Dicyanoanthracene | 0.37            | 0.10                       | -                          |
| Phenosafranin         | ~ 0.41          | 0.30                       | 0.11                       |
| Eosin Y               | ~ 0.47          | -                          | 0.11                       |
| Aromatic amines       | 0.31            | -                          | ~0.31                      |
| Metoxybenzenes        | 0.31            | -                          | ~0.24                      |
| Quinones              | 0.27            | ~0.23                      |                            |

### Calculation of the exponential factor ( $\beta$ )

**Table 3-SI:** Estimated  $\beta$  for the solvent mediated photoinduced ET reaction between DCA and electron donors in acetonitrile.

| Quencher                | $\Delta G_{AS}^a$<br>(eV) | $\Delta G_{DS}^b$<br>(eV) | $\Delta G_{eff}^c$<br>(eV) | $\beta^d$<br>( $\text{nm}^{-1}$ ) | $\beta^e$<br>( $\text{nm}^{-1}$ ) |
|-------------------------|---------------------------|---------------------------|----------------------------|-----------------------------------|-----------------------------------|
| TMPD                    | 3.3                       | 2.7                       | 2.7                        | 15.9                              | 9.4                               |
| TMBZ                    | 3.3                       | 2.8                       | 2.8                        | 16.4                              | 9.7                               |
| p-anisidine             | 3.3                       | 3.2                       | 3.2                        | 17.4                              | 10.2                              |
| p-toluidine             | 3.3                       | 3.3                       | 3.3                        | 17.7                              | 10.3                              |
| 1,2,4-trimethoxybenzene | 3.3                       | 3.6                       | 3.3                        | 17.7                              | 10.3                              |
| 1,4-dimethoxybenzene    | 3.3                       | 3.8                       | 3.3                        | 17.7                              | 10.3                              |
| 1,2-dimethoxybenzene    | 3.3                       | 4.0                       | 3.3                        | 17.7                              | 10.3                              |

|         |     |     |     |      |      |
|---------|-----|-----|-----|------|------|
| Anisole | 3.3 | 4.3 | 3.3 | 17.7 | 10.3 |
|---------|-----|-----|-----|------|------|

a)  $\Delta G_{AS} = E_{oxS} - E_{redA} - E_{ooA}$ , where A is the fluorophore, b)  $\Delta G_{DS} = E_{oxD} - E_{redS}$ , where D is the quencher, c)  $\Delta G_{eff} = \min(\Delta G_{AS}, \Delta G_{DS})$ , d) Calculated according to Gamow expression, eq. 10, e) Calculated according to Kibori expression, eq. 11, with  $\lambda_{se} = 1$  eV,  $\nu_s = 850$  cm<sup>-1</sup> and  $d_{ss} = 0.5$  nm. The oxidation and reduction potentials of the solvent (acetonitrile) were taken from Ref 27 (main text),  $E_{oxS} = +5.21$  V vs SCE and  $E_{redS} = -2.51$  vs SCE.

**Table 4-SI:** Estimated  $\beta$  for the solvent mediated photoinduced ET reaction between phenosafranine and electron donors in acetonitrile.

| Quencher                | $\Delta G_{AS}$ <sup>a</sup><br>(eV) | $\Delta G_{DS}$ <sup>b</sup><br>(eV) | $\Delta G_{eff}$ <sup>c</sup><br>(eV) | $\beta^d$<br>(nm <sup>-1</sup> ) | $\beta^e$<br>(nm <sup>-1</sup> ) |
|-------------------------|--------------------------------------|--------------------------------------|---------------------------------------|----------------------------------|----------------------------------|
| TMPD                    | 3.5                                  | 2.7                                  | 2.7                                   | 15.9                             | 9.4                              |
| TMBZ                    | 3.5                                  | 2.8                                  | 2.8                                   | 16.4                             | 9.7                              |
| p-anisidine             | 3.5                                  | 3.2                                  | 3.2                                   | 17.4                             | 10.2                             |
| N,N-dimethylaniline     | 3.5                                  | 3.3                                  | 3.3                                   | 17.7                             | 10.3                             |
| p-toluidine             | 3.5                                  | 3.3                                  | 3.3                                   | 17.7                             | 10.3                             |
| N-methylaniline         | 3.5                                  | 3.3                                  | 3.3                                   | 17.8                             | 10.4                             |
| aniline                 | 3.5                                  | 3.4                                  | 3.4                                   | 18.1                             | 10.5                             |
| 2-methylindole          | 3.5                                  | 3.6                                  | 3.5                                   | 18.4                             | 10.6                             |
| 1,2,4-trimethoxybenzene | 3.5                                  | 3.6                                  | 3.5                                   | 18.4                             | 10.6                             |

|                      |     |     |     |      |      |
|----------------------|-----|-----|-----|------|------|
| indole               | 3.5 | 3.7 | 3.5 | 18.4 | 10.6 |
| 1,4-dimethoxybenzene | 3.5 | 3.8 | 3.5 | 18.4 | 10.6 |

a)  $\Delta G_{AS} = E_{oxS} - E_{redA} - E_{ooA}$ , where A is the fluorophore, b)  $\Delta G_{DS} = E_{oxD} - E_{redS}$ , where D is the quencher, c)  $\Delta G_{eff} = \min(\Delta G_{AS}, \Delta G_{DS})$ , d) Calculated according to Gamow expression, eq. 10, e) Calculated according to Kibori expression, eq. 11, with  $\lambda_{se} = 1$  eV,  $\nu_s = 850$  cm<sup>-1</sup> and  $d_{ss} = 0.5$  nm. The oxidation and reduction potentials of the solvent (acetonitrile) were taken from Ref 27 (main text),  $E_{oxS} = +5.21$  V vs SCE and  $E_{redS} = -2.51$  vs SCE.

**Table 5-SI:** Estimated  $\beta$  for the solvent mediated photoinduced ET reaction between Eosin Y and electron acceptors in acetonitrile.

| Quencher                 | $\Delta G_{AS}$ <sup>a</sup><br>(eV) | $\Delta G_{DS}$ <sup>b</sup><br>(eV) | $\Delta G_{eff}$ <sup>c</sup><br>(eV) | $\beta$ <sup>d</sup><br>(nm <sup>-1</sup> ) | $\beta$ <sup>e</sup><br>(nm <sup>-1</sup> ) |
|--------------------------|--------------------------------------|--------------------------------------|---------------------------------------|---------------------------------------------|---------------------------------------------|
| chloro-p-benzoquinone    | 5.55                                 | 1.0                                  | 1.0                                   | 9.8                                         | 6.0                                         |
| p-benzoquinone           | 5.71                                 | 1.0                                  | 1.0                                   | 9.8                                         | 6.0                                         |
| methyl-p-benzoquinone    | 5.79                                 | 1.0                                  | 1.0                                   | 9.8                                         | 6.0                                         |
| 2,6-dimethylbenzoquinone | 5.88                                 | 1.0                                  | 1.0                                   | 9.8                                         | 6.0                                         |
| duroquinone              | 6.05                                 | 1.0                                  | 1.0                                   | 9.8                                         | 6.0                                         |

a)  $\Delta G_{AS} = E_{oxS} - E_{redA}$ , where A is the quencher, b)  $\Delta G_{DS} = E_{oxD} - E_{redS} - E_{ooD}$ , where D is the fluorophore, c)  $\Delta G_{eff} = \min(\Delta G_{AS}, \Delta G_{DS})$ , d) Calculated according to Gamow expression, eq. 10, e) Calculated according to Kibori expression, eq. 11, with  $\lambda_{se} = 1$  eV,  $\nu_s =$

$850 \text{ cm}^{-1}$  and  $d_{ss} = 0.5 \text{ nm}$ . The oxidation and reduction potentials of the solvent (acetonitrile) were taken from Ref 27 (main text),  $E_{oxS} = +5.21 \text{ V vs SCE}$  and  $E_{redS} = -2.51 \text{ vs SCE}$ .

**Table 6-SI:** Estimated  $\beta$  for the solvent mediated photoinduced ET reaction between phenoafranine and electron acceptors in acetonitrile.

| Quencher                 | $\Delta G_{AS}^a$<br>(eV) | $\Delta G_{DS}^b$<br>(eV) | $\Delta G_{eff}^c$<br>(eV) | $\beta^d$<br>( $\text{nm}^{-1}$ ) | $\beta^e$<br>( $\text{nm}^{-1}$ ) |
|--------------------------|---------------------------|---------------------------|----------------------------|-----------------------------------|-----------------------------------|
| chloro-p-benzoquinone    | 5.55                      | 1.5                       | 1.5                        | 11.9                              | 7.2                               |
| p-benzoquinone           | 5.71                      | 1.5                       | 1.5                        | 11.9                              | 7.2                               |
| methyl-p-benzoquinone    | 5.79                      | 1.5                       | 1.5                        | 11.9                              | 7.2                               |
| 2,6-dimethylbenzoquinone | 5.88                      | 1.5                       | 1.5                        | 11.9                              | 7.2                               |
| duroquinone              | 6.05                      | 1.5                       | 1.5                        | 11.9                              | 7.2                               |

a)  $\Delta G_{AS} = E_{oxS} - E_{redA}$ , where A is the quencher, b)  $\Delta G_{DS} = E_{oxD} - E_{redS} - E_{ooD}$ , where D is the fluorophore, c)  $\Delta G_{eff} = \min(\Delta G_{AS}, \Delta G_{DS})$ , d) Calculated according to Gamow expression, eq. 10, e) Calculated according to Kibori expression, eq. 11, with  $\lambda_{se} = 1 \text{ eV}$ ,  $\nu_s = 850 \text{ cm}^{-1}$  and  $d_{ss} = 0.5 \text{ nm}$ . The oxidation and reduction potentials of the solvent (acetonitrile) were taken from Ref 27 (main text),  $E_{oxS} = +5.21 \text{ V vs SCE}$  and  $E_{redS} = -2.51 \text{ vs SCE}$ .

**Figure 4-SI:** Experimental  $k_q$  for the quenching of PS emission by electron donors (○). The solid line corresponds to the simulation of the second order diffusion-mediated electron transfer rate constant according to the model developed by Tachiya and Murata. The parameters used for the simulation are:  $r_A = 0.41 \text{ nm}$ ,  $r_D = 0.31 \text{ nm}$ ,  $\lambda_\nu = 0.61 \text{ eV}$ ,  $V_o = 100 \text{ cm}^{-1}$ ,  $\beta = 10 \text{ nm}^{-1}$  and  $D = 3.2 \times 10^{-9} \text{ m}^2 / \text{s}$ .

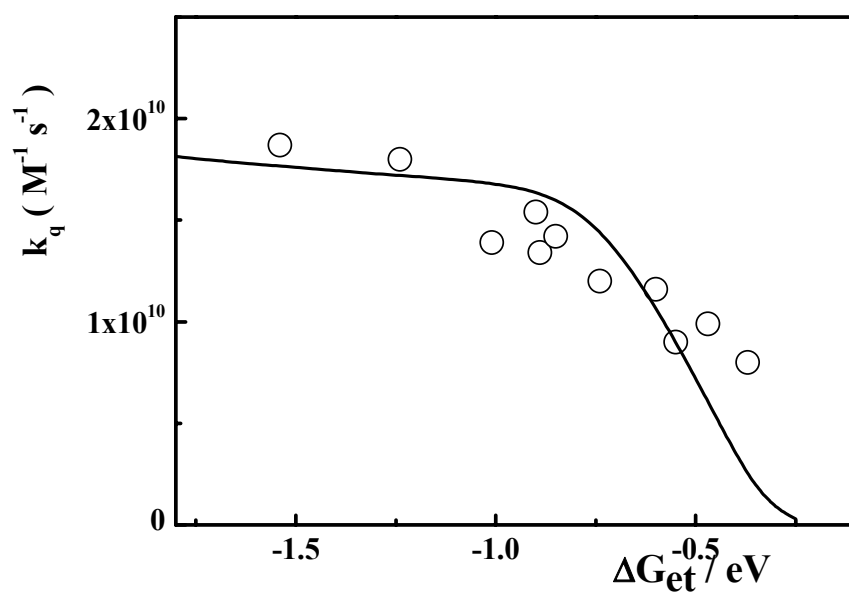

Supplement: b708797g.pdf [file b708797g.pdf]
